# Supplementary material for: Increased levels of 3-hydroxykynurenine parallel disease severity in human acute pancreatitis
Source: PubMed Central journal article supplement (PMC5037401; doi:10.1038/srep33951), 2016-09-27

## SUPPLEMENTARY DATA

### TITLE

Increased levels of 3-hydroxykynurenine parallel disease severity in human acute pancreatitis

### AUTHORS

Christos Skouras<sup>1\*</sup>, Xiaozhong Zheng<sup>2</sup>, Margaret Binnie<sup>3</sup>, Natalie ZM Homer<sup>4</sup>, Toby BJ Murray<sup>2</sup>, Darren Robertson<sup>5</sup>, Lesley Briody<sup>6</sup>, Finny Paterson<sup>6</sup>, Heather Spence<sup>6</sup>, Lisa Derr<sup>6</sup>, Alastair J Hayes<sup>2</sup>, Andreas Tsoumanis<sup>7</sup>, Dawn Lyster<sup>8</sup>, Rowan W Parks<sup>1</sup>, O James Garden<sup>1</sup>, John P Iredale<sup>2</sup>, Iain J Uings<sup>9</sup>, John Liddle<sup>9</sup>, Wayne L Wright<sup>10</sup>, George Dukes<sup>11</sup>, Scott P Webster<sup>3</sup>, Damian J Mole<sup>1,2</sup>

## Supplementary Table S1

Demographic characteristics of patients recruited in the IMOFAP study. For the computation of the length of stay, patient re-admission(s) with 10 days from hospital discharge were also taken into account; 'Alcohol use' refers to any alcohol use.

**ED:** emergency department; **LOS:** length of stay; **ITU:** intensive treatment unit; **HDU:** high-dependency unit; **NA:** not applicable.

|                                | Diagnosis |            |           | Modified MODS (Atlanta 2012) |           |           |
|--------------------------------|-----------|------------|-----------|------------------------------|-----------|-----------|
|                                | Overall   | Non-AP     | AP        | Mild                         | Moderate  | Severe    |
| <b>No of patients</b>          | 79        | 22 (28%)   | 57 (72%)  | 25 (44%)                     | 23 (40%)  | 9 (16%)   |
| <b>Gender</b>                  |           |            |           |                              |           |           |
| <b>Male</b>                    | 47 (60%)  | 15         | 32 (56%)  | 16                           | 12        | 4         |
| <b>Age</b>                     |           |            |           |                              |           |           |
| <b>Median</b>                  | 59.6      | 60.7       | 57        | 62.3                         | 54.8      | 64.8      |
| <b>IQR</b>                     | 47.7-73.9 | 50.1-70.0  | 47-77.1   | 46.4-79.0                    | 47.3-67.5 | 49.4-80.6 |
| <b>BMI</b>                     |           |            |           |                              |           |           |
| <b>Mean</b>                    | 27.2      | 25.5       | 27.9      | 27                           | 28        | 28        |
| <b>SD</b>                      | 6.0       | 4.7        | 6.3       | 5.6                          | 7.4       | 5.8       |
| <b>Source of recruitment</b>   |           |            |           |                              |           |           |
| <b>ED</b>                      | 70 (89%)  | 19         | 32 (56%)  | 21                           | 22        | 8         |
| <b>Other</b>                   | 9 (11%)   | 3          | 25 (43%)  | 4                            | 1         | 1         |
| <b>LOS</b>                     |           |            |           |                              |           |           |
| <b>Median</b>                  | 5         | 4          | 5         | 5                            | 6         | 7         |
| <b>IQR</b>                     | 3-8       | 2-11       | 3-8       | 3-6                          | 3-9       | 5-13      |
| <b>Aetiology</b>               |           |            |           |                              |           |           |
| <b>Gallstones</b>              | NA        | NA         | 27 (47%)  | 11                           | 14        | 2         |
| <b>Alcohol</b>                 | NA        | NA         | 18 (32%)  | 8                            | 5         | 5         |
| <b>Idiopathic</b>              | NA        | NA         | 7 (12%)   | 2                            | 3         | 2         |
| <b>Other</b>                   | NA        | NA         | 5 (9%)    | 4                            | 1         | 0         |
| <b>Charlson Index</b>          |           |            |           |                              |           |           |
| <b>Median</b>                  | 2         | 3          | 2         | 2                            | 1         | 2         |
| <b>IQR</b>                     | 1-5       | 1-5        | 1-4       | 1-4                          | 0-3       | 2-4       |
| <b>Mortality</b>               |           |            |           |                              |           |           |
| <b>In-hospital</b>             | 4 (5%)    | 1          | 3 (5%)    | 0                            | 1         | 2         |
| <b>30-day</b>                  | 2 (3%)    | 0          | 2 (4%)    | 0                            | 0         | 2         |
| <b>Onset to presentation</b>   |           |            |           |                              |           |           |
| <b>Median (hours)</b>          | 21.4      | 46.0       | 15.3      | 9.75                         | 23.4      | 21.3      |
| <b>IQR (hours)</b>             | 8.5-73.3  | 10.6-135.7 | 8.3-50.1  | 5.3-37.8                     | 9.2-75.5  | 9.2-73.0  |
| <b>Onset to recruitment</b>    |           |            |           |                              |           |           |
| <b>Median (hours)</b>          | 33.0      | 49.5       | 25.9      | 18.5                         | 26.7      | 36.3      |
| <b>IQR (hours)</b>             | 14.2-92.0 | 18.0-138.5 | 13.8-70.8 | 10-46.2                      | 16.6-82.3 | 17.8-77.8 |
| <b>Alcohol use</b>             |           |            |           |                              |           |           |
| <b>Current</b>                 | 42 (53%)  | 10         | 32 (56%)  | 15                           | 12        | 5         |
| <b>Previous</b>                | 8 (10%)   | 4          | 4 (7%)    | 2                            | 2         | 0         |
| <b>None</b>                    | 29 (37%)  | 8          | 21 (37%)  | 8                            | 9         | 4         |
| <b>Critical Care admission</b> |           |            |           |                              |           |           |
| <b>ITU</b>                     | 2 (3%)    | 0          | 2 (4%)    | 0                            | 0         | 2         |
| <b>HDU</b>                     | 5 (6%)    | 3          | 2 (4%)    | 0                            | 0         | 2         |
| <b>Overall</b>                 | 7 (9%)    | 3          | 4 (7%)    | 0                            | 0         | 4         |

## Supplementary Table S2

Timing of hospital presentation of study participant by day of the week and time of day.

**WD**: weekday; **WE**: weekend

|                        | Overall |     | AP |     | Non-AP |     |
|------------------------|---------|-----|----|-----|--------|-----|
|                        | N       | %   | N  | %   | N      | %   |
| <b>Day of the week</b> |         |     |    |     |        |     |
| <b>Monday</b>          | 9       | 11  | 6  | 11  | 3      | 14  |
| <b>Tuesday</b>         | 12      | 15  | 8  | 14  | 4      | 18  |
| <b>Wednesday</b>       | 8       | 10  | 6  | 11  | 2      | 9   |
| <b>Thursday</b>        | 18      | 23  | 14 | 25  | 4      | 18  |
| <b>Friday</b>          | 9       | 11  | 7  | 12  | 2      | 9   |
| <b>Saturday</b>        | 9       | 11  | 7  | 1   | 2      | 9   |
| <b>Sunday</b>          | 14      | 18  | 9  | 16  | 5      | 23  |
| <b>WD vs. WE</b>       |         |     |    |     |        |     |
| <b>Weekday</b>         | 56      | 71  | 41 | 72  | 15     | 68  |
| <b>Weekend</b>         | 23      | 29  | 16 | 28  | 7      | 32  |
| <b>Time of day</b>     |         |     |    |     |        |     |
| <b>08:00-15:59</b>     | 23      | 29  | 13 | 23  | 10     | 46  |
| <b>16:00-23:59</b>     | 32      | 41  | 27 | 47  | 5      | 23  |
| <b>00:00-07:59</b>     | 24      | 30  | 17 | 30  | 7      | 32  |
| <b>Overall</b>         | 79      | 100 | 57 | 100 | 22     | 100 |

## Supplementary Table S3

Summary measures of serial CRP, albumin and cytokine measures, per patient group. Comparisons were performed by utilising one-way ANOVA or Kruskal-Wallis H testing, as appropriate, following normality testing (Kolmogorov-Smirnov). Time-to-Peak and Time-to-Min analyses were performed by applying the Kaplan-Meier method on concentration levels from T0 up to and including T72. \*: mean value.

|                           | Summary Measure                       | Mild              | Moderate           | Severe               | P-value          |
|---------------------------|---------------------------------------|-------------------|--------------------|----------------------|------------------|
| Albumin (g/L)             | Peak values, median (IQR)             | 35 (32-37)        | 33 (30-37)         | 26 (24-31)           | <b>0.006</b>     |
|                           | Minimum values, median (IQR)          | 30 (27-32)        | 27 (23-31)         | 21 (19-26)           | <b>0.001</b>     |
|                           | Mean values, median (IQR)             | 32.9 (29.6-34.7)  | 29.8 (26.6-33.4)   | 22.6 (21.8-28.3)     | <b>0.001</b>     |
|                           | Time-to-Min, median hours (95% C.I.)  | 12.0 (7.8-16.2)   | 24.0 (16.6-31.4)   | 21.0 (0.0-47.3)      | 0.314            |
|                           | Standardized AUC, median (IQR)        | 32.5 (29.6-34.0)  | 28.1 (25.9-31.5)   | 22.1 (21.3-27.4)     | <b>&lt;0.001</b> |
| C-reactive protein (mg/L) | Peak values, median (IQR)             | 97 (32-177)       | 191 (105-326)      | 283 (246-391)        | <b>0.001</b>     |
|                           | Minimum values, median (IQR)          | 15 (7-46)         | 38 (11-96)         | 103 (88-119)         | <b>0.016</b>     |
|                           | Mean values, median (IQR)             | 53 (22.7-122.2)   | 125.6 (56.2-190.7) | 200.5 (180.6-255.0)  | <b>0.001</b>     |
|                           | Time-to-Peak, median hours (95% C.I.) | 24.0 (13.7-34.3)  | 48.0 (40.4-55.6)   | 24.0 (0.0-76.6)      | 0.455            |
|                           | Standardized AUC, median (IQR)        | 58.9 (26.3-131.2) | 148.1 (74.5-243.9) | 225.6 (174.9-260.2)  | <b>0.001</b>     |
| IL-1 Beta (pg/mL)         | Peak values, median (IQR)             | 1.1 (0.0-4.5)     | 4.2 (0.0-7.3)      | 6.2 (4.2-12.2)       | <b>0.007</b>     |
|                           | Minimum values, median (IQR)          | 0.0 (0.0-2.6)     | 0.1 (0.0-3.3)      | 2.6 (0.1-3.5)        | 0.125            |
|                           | Mean values, median (IQR)             | 0.6 (0.0-3.0)     | 1.9 (0.0-4.9)      | 4.6 (2.6-6.4)        | <b>0.006</b>     |
|                           | Time-to-Peak, median hours (95% C.I.) | 3.5* (0.7-6.3)    | 6.0 (0.0-13.6)     | 14.7* (0.0-32.0)     | 0.057            |
|                           | Standardized AUC, median (IQR)        | 0.2 (0.0-2.5)     | 2.6 (0.0-5.1)      | 4.0 (1.7-6.1)        | <b>0.005</b>     |
| IL-6 (pg/mL)              | Peak values, median (IQR)             | 33.8 (13.4-80.5)  | 123.4 (44.2-406.1) | 904.6 (202.4-1668.8) | <b>0.001</b>     |
|                           | Minimum values, median (IQR)          | 9.75 (3.2-22.5)   | 22.5 (8.9-62.6)    | 40.3 (19.4-66.8)     | <b>0.002</b>     |
|                           | Mean values, median (IQR)             | 19.1 (10.5-56.6)  | 76.1 (32.8-185.5)  | 250.3 (116.2-587.7)  | <b>0.001</b>     |
|                           | Time-to-Peak, median hours (95% C.I.) | 6.0 (0.2-11.8)    | 12.0 (6.4-17.6)    | 6.0 (3.6-8.5)        | 0.345            |
|                           | Standardized AUC, median (IQR)        | 20.7 (9.9-53.5)   | 59.5 (26.8-188.1)  | 180.8 (83.9-373.2)   | <b>0.003</b>     |
| IL-8 (pg/mL)              | Peak values, median (IQR)             | 16.2 (8.78-29.3)  | 16.2 (8.6-40.0)    | 81.8 (15.2-175.2)    | 0.061            |
|                           | Minimum values, median (IQR)          | 4.0 (1.4-7.1)     | 3.5 (0.6-8.2)      | 9.4 (7.9-36.7)       | <b>0.022</b>     |
|                           | Mean values, median (IQR)             | 8.9 (5.3-21.1)    | 9.0 (4.7-22.3)     | 35.6 (12.3-109.2)    | <b>0.032</b>     |
|                           | Time-to-Peak, median hours (95% C.I.) | 12.0 (7.3-16.7)   | 12.0 (6.8-17.2)    | 6.0 (1.6-10.4)       | 0.296            |
|                           | Standardized AUC, median (IQR)        | 9.4 (5.1-16.6)    | 8.8 (3.7-20.9)     | 29.6 (12.2-110.9)    | <b>0.026</b>     |
| IL-10 (pg/mL)             | Peak values, median (IQR)             | 5.4 (2.3-11.4)    | 9.6 (4.2-18.4)     | 19.6 (10.1-43.0)     | <b>0.006</b>     |
|                           | Minimum values, median (IQR)          | 2.5 (0.0-4.5)     | 3.5 (0.0-6.4)      | 2.4 (0.0-7.0)        | 0.517            |
|                           | Mean values, median (IQR)             | 3.2 (0.5-7.2)     | 5.6 (1.9-10.5)     | 14.7 (3.4-28.1)      | 0.073            |
|                           | Time-to-Peak, median hours (95% C.I.) | 3.0 (0.0-6.7)     | 12.0 (4.6-19.4)    | 8.0* (0.0-19.1)      | 0.369            |
|                           | Standardized AUC, median (IQR)        | 4.1 (0.29-6.97)   | 4.6 (2.0-7.3)      | 9.2 (3.3-18.2)       | 0.209            |
| IL-17 (pg/mL)             | Peak values, median (IQR)             | 1.4 (0.0-3.8)     | 0.1 (0.0-2.2)      | 7.4 (3.0-12.8)       | 0.087            |
|                           | Minimum values, median (IQR)          | 0.0 (0.0-0.0)     | 0.0 (0.0-0.0)      | 2.1 (0.9-3.5)        | <b>&lt;0.001</b> |
|                           | Mean values, median (IQR)             | 0.4 (0.0-1.0)     | 0.0 (0.0-0.9)      | 5.2 (1.6-8.2)        | 0.061            |
|                           | Time-to-Peak, median hours (95% C.I.) | 6.0 (0.4-11.6)    | 12.0 (5.6-18.4)    | 3.0 (0.0-6.9)        | 0.914            |
|                           | Standardized AUC, median (IQR)        | 0.4 (0.0-1.0)     | 0.1 (0.0-1.2)      | 3.6 (1.4-7.6)        | 0.069            |

|                           |                                       |                        |                        |                        |              |
|---------------------------|---------------------------------------|------------------------|------------------------|------------------------|--------------|
| CA 15-3 (pg/mL)           | Peak values, median (IQR)             | 20.2 (13.8-31.0)       | 15.0 (11.6-20.8)       | 18.5 (17.5-30.5)       | 0.083        |
|                           | Minimum values, median (IQR)          | 12.4 (8.8-16.8)        | 8.0 (5.3-12.0)         | 11.0 (8.5-23.0)        | 0.072        |
|                           | Mean values, median (IQR)             | 17.6 (13.0-21.8)       | 11.7 (6.8-16.3)        | 14.6 (11.8-26.7)       | 0.079        |
|                           | Time-to-Min, median hours (95% C.I.)  | 6.0 (4.0-8.0)          | 24.0 (18.7-29.3)       | 12.0 (0.0-38.3)        | <b>0.008</b> |
|                           | Standardized AUC, median (IQR)        | 16.7 (12.3-22.5)       | 10.9 (6.4-14.3)        | 15.2 (11.2-27.3)       | <b>0.035</b> |
| Insulin (pg/mL)           | Peak values, median (IQR)             | 1337.2 (953.7-1758.1)  | 1212.7 (600.6-2222.6)  | 764.2 (680.5-1630.3)   | 0.244        |
|                           | Minimum values, median (IQR)          | 343.6 (230.1-641.6)    | 375.3 (198.9-619.3)    | 274.5 (197.3-330.7)    | 0.384        |
|                           | Mean values, median (IQR)             | 742.1 (573.2-985.1)    | 780.2 (368.5-1350.6)   | 538.5 (506.3-650.3)    | 0.234        |
|                           | Time-to-Min, median hours (95% C.I.)  | NA                     | NA                     | NA                     | NA           |
|                           | Standardized AUC, median (IQR)        | 760.5 (588.6-1123.7)   | 744.4 (478.0-1290.8)   | 440.0 (349.8-566.3)    | <b>0.042</b> |
| Insulin C-Peptide (pg/mL) | Peak values, median (IQR)             | 3138.0 (2457.3-3817.9) | 1898.8 (1135.7-3032.3) | 1590.3 (863.4-4067.4)  | 0.205        |
|                           | Minimum values, median (IQR)          | 976.0 (427.0-1636.4)   | 559.4 (119.1-1278.9)   | 421.2 (236.2-1294.4)   | 0.350        |
|                           | Mean values, median (IQR)             | 1902.8 (1205.5-2725.3) | 1193.2 (625.9-2040.3)  | 660.4 (515.5-2244.2)   | 0.311        |
|                           | Time-to-Peak, median hours (95% C.I.) | 24.0 (12.5-35.5)       | 24.0 (0.0-50.4)        | 6.0 (0.0-14.8)         | 0.548        |
|                           | Standardized AUC, median (IQR)        | 1955.7 (1371.3-2715.2) | 1320.5 (874.0-2096.0)  | 833.8 (501.7-2688.2)   | 0.324        |
| CD40 ligand (ng/mL)       | Peak values, median (IQR)             | 1.6 (0.9-2.6)          | 2.4 (1.5-3.9)          | 2.9 (1.2-3.1)          | 0.162        |
|                           | Minimum values, median (IQR)          | 0.5 (0.4-0.7)          | 0.7 (0.4-1.1)          | 0.6 (0.3-0.7)          | 0.153        |
|                           | Mean values, median (IQR)             | 0.9 (0.6-1.5)          | 1.3 (0.9-2.4)          | 1.1 (0.8-1.7)          | 0.092        |
|                           | Time-to-Peak, median hours (95% C.I.) | 6.0 (0.5-11.5)         | 3.0 (0.0-13.7)         | 12.0 (3.7-20.3)        | 0.947        |
|                           | Standardized AUC, median (IQR)        | 0.8 (0.6-1.7)          | 1.5 (0.7-2.1)          | 1.0 (0.7-1.8)          | 0.199        |
| Chemerin (ng/mL)          | Peak values, median (IQR)             | 11.6 (8.9-13.6)        | 14.5 (11.8-17.0)       | 12.4 (10.3-17.0)       | 0.081        |
|                           | Minimum values, median (IQR)          | 8.5 (6.7-10.7)         | 8.6 (6.6-12.7)         | 8.1 (5.7-9.2)          | 0.588        |
|                           | Mean values, median (IQR)             | 9.9 (7.6-11.3)         | 10.7 (7.8-14.6)        | 9.6 (8.0-10.6)         | 0.345        |
|                           | Time-to-Peak, median hours (95% C.I.) | 24.0 (15.8-32.2)       | 48.0 (32.8-63.2)       | 48.0 (14.7-81.3)       | 0.293        |
|                           | Standardized AUC, median (IQR)        | 9.9 (7.6-11.9)         | 11.3 (9.7-14.1)        | 9.5 (8.1-11.8)         | 0.127        |
| TFF3 (ng/mL)              | Peak values, median (IQR)             | 3.7 (3.1-4.6)          | 3.7 (3.1-5.6)          | 7.0 (5.4-8.4)          | <b>0.008</b> |
|                           | Minimum values, median (IQR)          | 3.0 (2.4-3.9)          | 3.3 (2.4-4.2)          | 4.5 (4.0-6.4)          | <b>0.025</b> |
|                           | Mean values, median (IQR)             | 3.3 (2.7-4.2)          | 3.5 (2.6-4.7)          | 5.4 (4.8-7.6)          | <b>0.011</b> |
|                           | Time-to-Peak, median hours (95% C.I.) | 6.0 (1.1-10.9)         | 12.0 (0.4-23.6)        | 6.0 (1.7-10.3)         | 0.719        |
|                           | Standardized AUC, median (IQR)        | 3.33 (2.72-4.1)        | 3.5 (2.8-4.9)          | 5.2 (4.9-7.5)          | <b>0.013</b> |
| RAGE (ng/mL)              | Peak values, median (IQR)             | 2.3 (1.6-3.4)          | 2.1 (1.5-3.3)          | 2.8 (2.3-4.2)          | 0.269        |
|                           | Minimum values, median (IQR)          | 1.7 (1.2-2.2)          | 1.5 (1.0-2.1)          | 1.9 (1.8-2.0)          | 0.374        |
|                           | Mean values, median (IQR)             | 1.9 (1.3-2.8)          | 1.7 (1.3-2.6)          | 2.2 (2.1-3.8)          | 0.228        |
|                           | Time-to-Peak, median hours (95% C.I.) | 6.0 (3.6-8.4)          | 24.0 (15.6-32.5)       | 12.0 (3.7-20.3)        | 0.455        |
|                           | Standardized AUC, median (IQR)        | 1.9 (1.4-2.7)          | 1.9 (1.6-2.6)          | 2.1 (2.0-3.3)          | 0.370        |
| CD163 (ng/mL)             | Peak values, median (IQR)             | 872.3 (585.3-1271.3)   | 1058.6 (827.2-1341.1)  | 1996.4 (1196.6-2640.0) | <b>0.017</b> |
|                           | Minimum values, median (IQR)          | 639.8 (449.7-996.6)    | 683.7 (543.95-897.8)   | 834.9 (699.8-1046.0)   | 0.480        |
|                           | Mean values, median (IQR)             | 778.0 (531.9-1137.2)   | 861.9 (723.4-1171.5)   | 1636.0 (1003.7-1846.8) | <b>0.031</b> |
|                           | Time-to-Peak, median hours (95% C.I.) | 3.0 (0.0-6.6)          | 3.0 (1.4-4.6)          | 6.0 (3.2-8.8)          | 0.112        |
|                           | Standardized AUC, median (IQR)        | 743.74 (493.0-1143.4)  | 833.4 (664.4-1052.9)   | 1417.9 (952.8-1812.5)  | <b>0.028</b> |
| IFN-γ (pg/mL)             | Peak values, median (IQR)             | 0.0 (0.0-0.0)          | 0.0 (0.0-0.5)          | 0.0 (0.0-1.2)          | 0.362        |
|                           | Minimum values, median (IQR)          | 0.0 (0.0-0.0)          | 0.0 (0.0-0.0)          | 0.0 (0.0-0.0)          | 0.162        |
|                           | Mean values, median (IQR)             | 0.0 (0.0-0.0)          | 0.0 (0.0-0.2)          | 0.0 (0.0-0.3)          | 0.295        |
|                           | Time-to-Peak, median hours (95% C.I.) | 3.0 (0.0-12.6)         | 12.0 (0.3-23.7)        | 36.0* (17.6-43.6)      | 0.990        |
|                           | Standardized AUC, median (IQR)        | 0.0 (0.0-0.0)          | 0.0 (0.0-0.2)          | 0.0 (0.0-0.6)          | 0.177        |
| TNF-α (pg/mL)             | Peak values, median (IQR)             | 1.3 (0.0-8.5)          | 3.1 (0.0-6.1)          | 9.9 (3.5-34.5)         | <b>0.031</b> |
|                           | Minimum values, median (IQR)          | 0.0 (0.0-0.6)          | 0.0 (0.0-1.8)          | 1.3 (0.1-3.6)          | 0.079        |
|                           | Mean values, median (IQR)             | 0.6 (0.0-3.8)          | 1.2 (0.0-3.2)          | 7.6 (2.6-15.5)         | <b>0.010</b> |
|                           | Time-to-Min, median hours (95% C.I.)  | 3.0 (0.0-6.9)          | 6.0 (0.0-29.8)         | 12.0 (0.0-29.5)        | 0.561        |
|                           | Standardized AUC, median (IQR)        | 0.4 (0.0-5.1)          | 1.1 (0.0-2.9)          | 7.2 (2.5-8.4)          | <b>0.017</b> |

|                                     |                                       |                  |                   |                 |              |
|-------------------------------------|---------------------------------------|------------------|-------------------|-----------------|--------------|
| B7-H1<br>(pg/mL)                    | Peak values, median (IQR)             | 0.0 (0.0-85.4)   | 0.0 (0.0-0.0)     | 0.0 (0.0-0.0)   | 0.160        |
|                                     | Minimum values, median (IQR)          | 0.0 (0.0-0.0)    | 0.0 (0.0-0.0)     | 0.0 (0.0-0.0)   | 0.550        |
|                                     | Mean values, median (IQR)             | 0.0 (0.0-14.2)   | 0.0 (0.0-0.0)     | 0.0 (0.0-0.0)   | 0.184        |
|                                     | Time-to-Peak, median hours (95% C.I.) | NA               | NA                | NA              | NA           |
|                                     | Standardized AUC, median (IQR)        | 0.0 (0.0-3.5)    | 0.0 (0.0-0.0)     | 0.0 (0.0-0.0)   | 0.370        |
| TRAIL-<br>TNFS10<br>(pg/mL)         | Peak values, median (IQR)             | 30.4 (13.7-71.3) | 20.26 (11.5-37.6) | 31.5 (0.0-34.5) | 0.382        |
|                                     | Minimum values, median (IQR)          | 10.8 (1.0-25.8)  | 10.1 (0.0-22.6)   | 14.1 (0.0-17.3) | 0.639        |
|                                     | Mean values, median (IQR)             | 22.9 (7.9-36.9)  | 15.0 (4.3-33.9)   | 18.7 (0.0-25.9) | 0.368        |
|                                     | Time-to-Peak, median hours (95% C.I.) | 6.0 (3.2-8.8)    | 12.0 (7.2-16.8)   | 3.0 (0.0-17.4)  | 0.707        |
|                                     | Standardized AUC, median (IQR)        | 20.4 (7.6-45.2)  | 13.1 (5.1-30.7)   | 18.9 (0.0-24.4) | 0.292        |
| CXCL12<br>(pg/mL)                   | Peak values, median (IQR)             | 0.0 (0.0-0.0)    | 0.0 (0.0-0.0)     | 0.0 (0.0-11.76) | <b>0.045</b> |
|                                     | Minimum values, median (IQR)          | 0.0 (0.0-0.0)    | 0.0 (0.0-0.0)     | 0.0 (0.0-0.0)   | 0.335        |
|                                     | Mean values, median (IQR)             | 0.0 (0.0-0.0)    | 0.0 (0.0-0.0)     | 0.0 (0.0-4.1)   | <b>0.040</b> |
|                                     | Time-to-Peak, median hours (95% C.I.) | NA               | NA                | NA              | NA           |
|                                     | Standardized AUC, median (IQR)        | 0.0 (0.0-0.0)    | 0.0 (0.0-0.0)     | 0.0 (0.0-5.0)   | <b>0.023</b> |
| Cardiac Troponin<br>I/c TNI (pg/mL) | Peak values, median (IQR)             | 9.4 (0.0-18.3)   | 13.9 (0.0-38.3)   | 14.3 (7.6-26.1) | 0.516        |
|                                     | Minimum values, median (IQR)          | 0.0 (0.0-0.0)    | 0.0 (0.0-0.0)     | 0.0 (0.0-0.0)   | 0.380        |
|                                     | Mean values, median (IQR)             | 1.9 (0.0-9.2)    | 4.64 (0.0-11.0)   | 4.8 (3.1-8.5)   | 0.868        |
|                                     | Time-to-Peak, median hours (95% C.I.) | 6.0 (3.8-8.2)    | 48.0 (22.9-73.1)  | 3.0 (0.0-6.5)   | <b>0.010</b> |
|                                     | Standardized AUC, median (IQR)        | 1.5 (0.0-10.3)   | 5.4 (0.0-10.7)    | 4.3 (2.6-12.6)  | 0.772        |

## Supplementary Table S4

Summary of P-values from post-hoc pairwise comparisons of significantly different standardized AUC of metabolites between patient groups, adjusted according to Dunn's test. Significant P-values are highlighted in bold. (\*: Tukey honestly significant difference test).

| Metabolite          | Pairwise Standardized AUC Comparison (Adjusted P-values) |                  |                     |
|---------------------|----------------------------------------------------------|------------------|---------------------|
|                     | Mild vs. Moderate                                        | Mild vs. Severe  | Moderate vs. Severe |
| Tryptophan*         | 0.128                                                    | <b>0.003</b>     | 0.156               |
| 3-Hydroxykynurenine | <b>0.040</b>                                             | 0.064            | 1.000               |
| 3-HK/TRP x1000      | 0.057                                                    | <b>0.004</b>     | 0.493               |
| Albumin             | <b>0.028</b>                                             | <b>&lt;0.001</b> | 0.171               |
| C-reactive protein  | <b>0.031</b>                                             | <b>0.001</b>     | 0.367               |
| IL-1 Beta           | 0.144                                                    | <b>0.005</b>     | 0.311               |
| IL-6                | 0.090                                                    | <b>0.003</b>     | 0.304               |
| IL-8                | 1.000                                                    | <b>0.043</b>     | <b>0.032</b>        |
| CA 15-3             | 0.058                                                    | 1.000            | 0.158               |
| Insulin             | 1.000                                                    | <b>0.044</b>     | 0.086               |
| TFF3                | 1.000                                                    | <b>0.014</b>     | <b>0.028</b>        |
| CD163               | 1.000                                                    | <b>0.025</b>     | 0.083               |
| TNF- $\alpha$       | 1.000                                                    | <b>0.026</b>     | <b>0.024</b>        |
| CXCL12              | 1.000                                                    | <b>0.031</b>     | <b>0.035</b>        |

## Supplementary Figure S5

Schematic representation of the IMOFAP scheduler mode of function. The scheduler populates the sequence of time-points for each consecutive participant in a digital calendar, as demonstrated below (orange colour: participant 1, blue colour: participant 2).

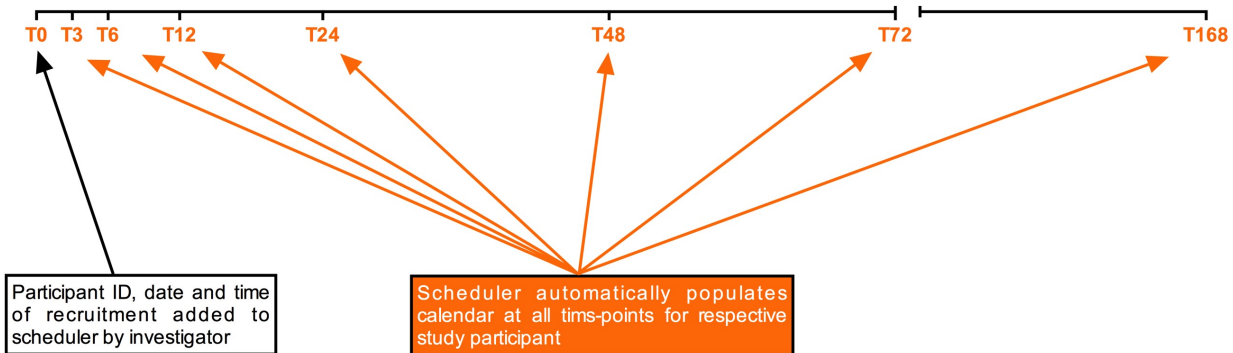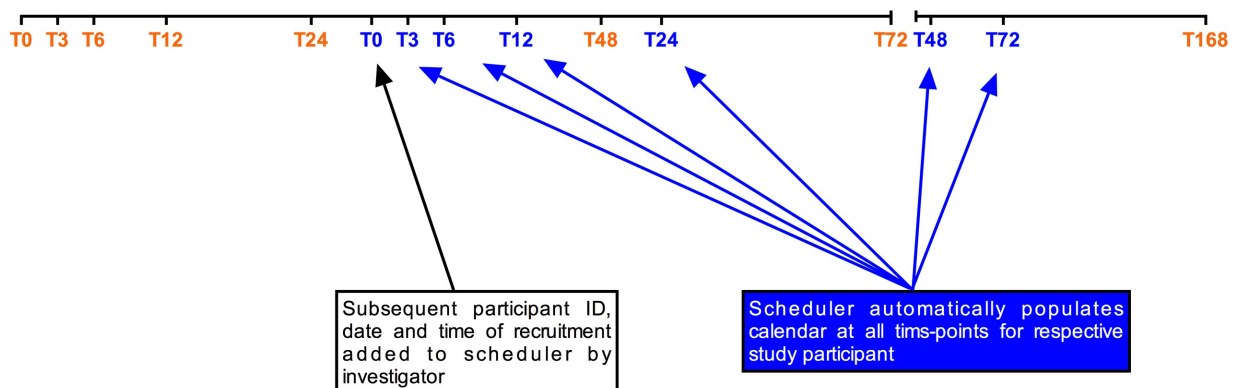

Supplement: srep33951-s1.pdf [file srep33951-s1.pdf]
